# Supplementary material for: Spatially separated cocatalysts for efficient charge separation: a hollow Pt/CdS/N–ZnO/CoOx graphene microtubule with high stability for photocatalytic reactions and sustainable recycling
Source: Royal Society of Chemistry journal article supplement (doi:10.1039/c9cy01776c), 2019-01-01
Supplement: c9cy01776c1.pdf [file c9cy01776c1.pdf]

## Supporting Information

### **Spatial Separation Co-catalysts for Efficient Charge Separation: Hollow Pt/CdS/N-ZnO/CoO<sub>x</sub> Graphene Microtubule with High Stability for Photocatalytic Reaction**

Yong Liang<sup>a,b</sup>, Yuexing Chen<sup>a</sup>, Maojun Zhao<sup>a</sup>, Li Lin<sup>a</sup>, Rongtao Duan<sup>a</sup>, Yuanyuan  
Jiang<sup>a</sup>, Jun Yan<sup>b</sup>, Ying Wang<sup>c</sup>, Jun Zeng<sup>d</sup>, Yunsong Zhang<sup>a,\*</sup>

<sup>a</sup>College of Science, Sichuan Agricultural University, Yaan 625014, China

<sup>b</sup>College of Pharmacy and Biological Engineering, Chengdu University, Chengdu  
610106, China

<sup>c</sup>College of Water Conservancy and Hydropower Engineering, Sichuan  
Agricultural University, Yaan 625014, China

<sup>d</sup>Key Laboratory of Green Chemistry of Sichuan Institutes of Higher Education,  
Sichuan University of Science and Engineering, Zigong 643002, China

\*Corresponding author: Tel: +86 835 2885782; Fax: +86 835 2862227; Email  
address: yaanyunsong@126.com

## **1 Method**

### **1.1. Characterizations**

X-ray diffraction analysis was performed on a DX-2600 X-ray diffractometer.  
The morphology and surface elements distribution of Pt/CdS/ZnO/CoO<sub>x</sub> graphene  
microtubule was observed by a scanning electron microscopy (SEM, JSM-7500F,  
Japan). Additionally, the Fourier transform infrared spectra were used to evaluate the  
surface functional groups of the samples (FTIR, Shimadzu-8400S, Japan) and the X-  
ray photoelectron spectroscopy (XPS, XSAM800, Britain) was applied to measure the

1 surface chemical composition, respectively. Raman spectra were acquired on a Raman  
 2 system (Thermo Scientific, DXR Smart, USA). The UV-visible diffuse reflectance  
 3 spectra (DRS, using BaSO<sub>4</sub> as the standard reference) were carried out on a  
 4 Lambda75 UV-Vis spectrophotometer. Photoluminescence (PL) spectra were detected  
 5 with FLS1000 Edinburgh Instrument. The electrochemical impedance spectroscopy  
 6 (EIS) measurements were measured with an electrochemical workstation (CHI-660c,  
 7 China).

## 8 2 Supplementary Results and Discussion

### 9 2.1 FTIR spectra and Roman spectra of samples

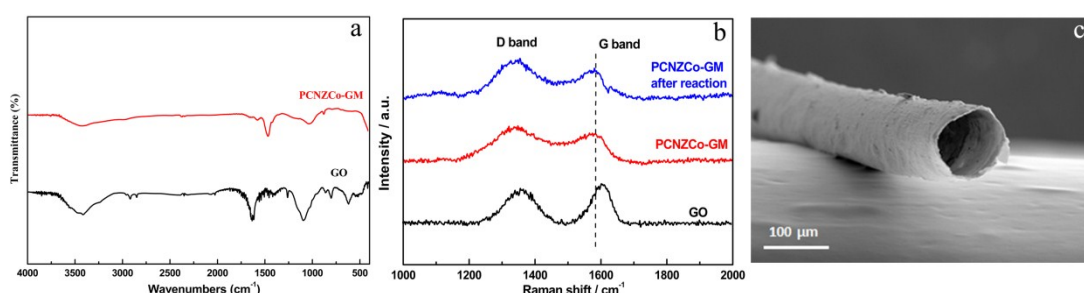

10 **Fig. S1** (a) FTIR spectra of PCNZCo-GM and GO, (b) Roman spectra of PCNZCo-  
 11 GM, PCNZCo-GM after reaction and GO, (c) SEM image of PCNZCo-GM after  
 12 reaction  
 13

### 14 2.2 XPS analysis of samples

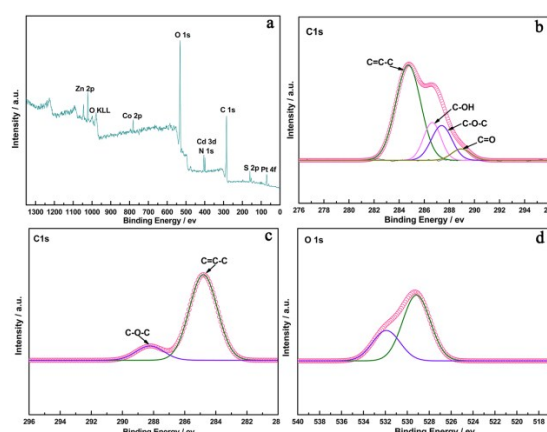

15 **Fig. S2** (a) Full-scale XPS survey spectrum of PCNZCo-GM, (b, c) XPS spectra of  
 16 C1s of GO and PCNZCo-GM and (d) XPS spectra of O1s of PCNZCo-GM.  
 17  
 18  
 19  
 20

### 2.3 Band-gap estimation

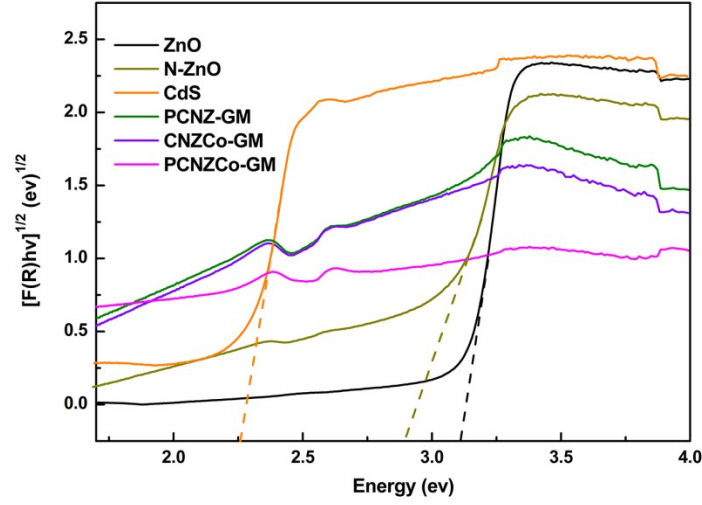

**Fig. S3** Plots of  $[F(R)hv]^2$  vs. the energy of samples.

As shown in Figure S4, the band gap energy of CdS and N-ZnO crystals were estimated to about 2.26 eV and 2.89 eV, respectively. Meanwhile, the band edge positions of conduction band (CB) and valence band (VB) of it can be calculated by the following Eqs. (2), (3):

$$E_{CB} = X - E_C - 0.5E_g \quad (1)$$

$$E_{VB} = E_g + E_{CB} \quad (2)$$

where,  $E_{CB}$  is the CB edge potential,  $E_{VB}$  is the VB edge potential,  $X$  is the electronegativity of the semiconductor, which is the electronegativity geometric mean of the constituent atoms (5.19 eV for CdS and 5.79 eV for ZnO),  $E_C$  is the energy of free electrons on the hydrogen scale (about 4.5 eV), and  $E_g$  is the band gap energy of the semiconductor). According to Eqs. (1) and (2), the CB and VB edge potentials of CdS are -0.44 eV and 1.82 eV, respectively, and N-ZnO are supposed to be -0.16 eV and 2.73 eV.

## 2.4 Photocatalytic ability of samples with different N-ZnO

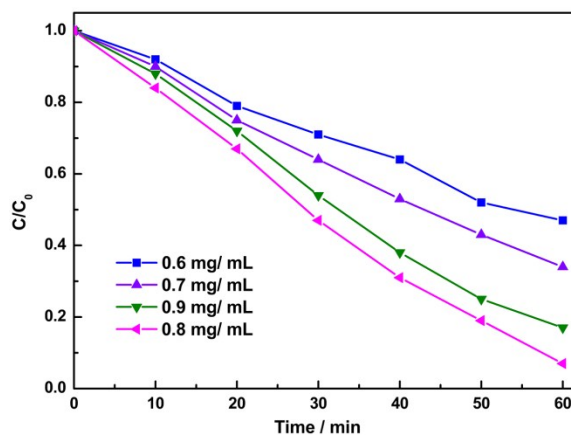

2

**Fig. S4** The degradation dynamics curves of PCNZCo-GM with different content of N-ZnO. The respective amount of the N-ZnO precursors in the hybrid preparation is as follows: 0.6 mg/mL, 0.7 mg/mL, 0.8 mg/mL, and 0.9 mg/mL.

## 2.5 Total organic carbon (TOC) removal efficiency

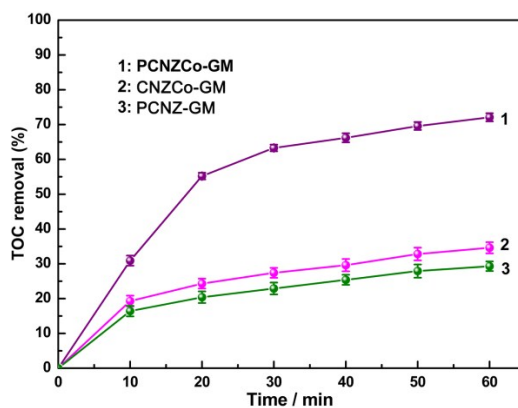

7

**Fig. S5** Total organic carbon (TOC) removal efficiency during the photodegradation process.

## 2.6 Degradation dynamics curves and recycling tests of colorless BPA

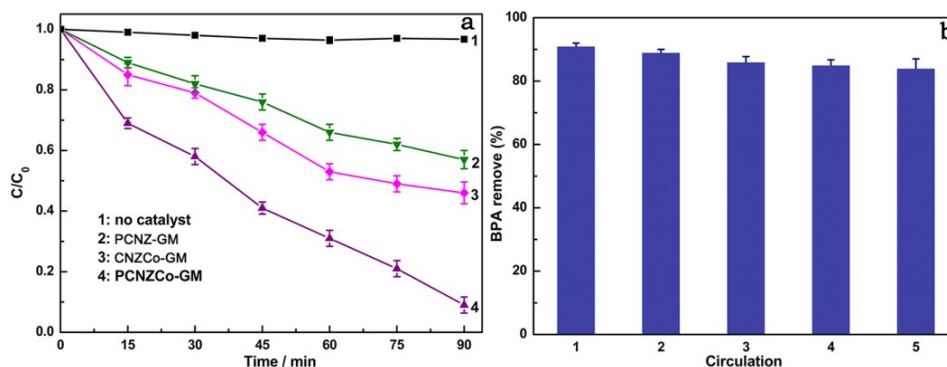

11

1 **Fig. S6** (a) Photocatalytic degradation curves of BPA and (b) recycling properties of  
 2 photodegrading BPA over the PCNZCo-GM.

### 3 2.7 The trapping experiments

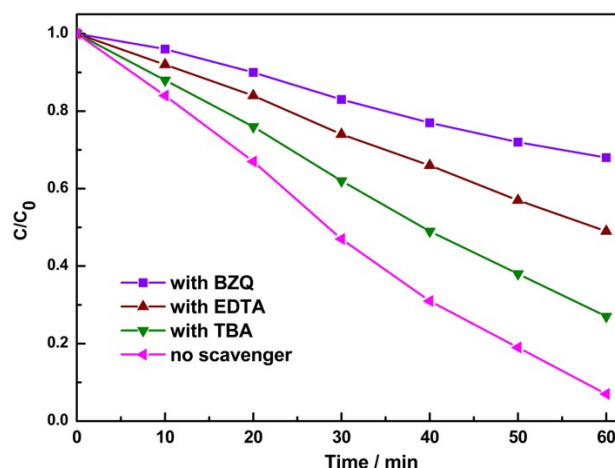

4

5 **Fig. S7** The trapping experiments of the PCNZCo-GM.

### 6 2.8 Photocatalytic performance comparisons of CdS or ZnO-based composites

7 Some researchers have reported the construction of CdS or ZnO-based  
 8 heterojunctions, such as CF@ZnO/CdS,<sup>1</sup> CdS/g-C<sub>3</sub>N<sub>4</sub>,<sup>2</sup> RGO/ZnO,<sup>3</sup> etc., which  
 9 enhance the photocatalytic performance than single photocatalysts. Effective  
 10 separation of charge and high cycle stability are key factors for photocatalysts  
 11 application. In this paper, we prepared a spatially separated hollow Pt/CdS/ZnO/CoO<sub>x</sub>  
 12 graphene microtube (PCNZCo-GM) with a double cocatalysts by capillary and  
 13 hydrothermal method for enhancing charge separation efficiency and photocatalytic  
 14 oxidation ability. Our method has significant advantage compared with traditional  
 15 methods because it enables easy inhalation of solution by capillary action and  
 16 efficient separation of cocatalysts. In the spatial separation composite, Pt as electron  
 17 collectors and CoO<sub>x</sub> as hole collectors were selectively decorated on the inner and  
 18 outer surfaces of CdS/N-ZnO double-layered graphene microtubule (CNZ-GM),  
 19 which prompts photogenerated electrons and holes near the surface to move in the  
 20 opposite direction. The absorption range of ZnO can be significantly expanded by  
 21 nitrogen doping and the charge separation can be effectively promoted by the

1 construction of Z-scheme heterojunction between CdS and N-ZnO. The hollow  
2 graphene microtubule structure with an oxidation-reduction co-catalyst supported on  
3 its inner and outer surfaces is conducive to simultaneous exposure of redox surface,  
4 charge separation, reusability and mass transfer in photocatalytic process. Combining  
5 other merits, such as excellent structural and functional characteristics of CdS and N-  
6 ZnO, large surface area and surface reaction kinetics promoted by cocatalysts, the  
7 PCNZCo-GM is an excellent photocatalyst of both photodegradation and disinfection.  
8 Compared with other CdS or ZnO-based photocatalysts, the PCNZCo-GM exhibits a  
9 more excellent photodegradation performance, rapider antibacterial performance and  
10 higher recycling stability (Table S1). Consequently, the PCNZCo-GM shows a great  
11 merit as a novel effective catalyst for water purification.

12

**Table S1.** Photocatalytic performance comparisons of the PCNZCo-GM with representative CdS or ZnO based composites.

| Catalyst category                                                                 | C <sub>catalyst</sub>  | Dyes/bacterial species                | Reaction conditions                    | Degradation performance | Disinfection activity     | Recycling Stability                            |
|-----------------------------------------------------------------------------------|------------------------|---------------------------------------|----------------------------------------|-------------------------|---------------------------|------------------------------------------------|
| CF@ZnO/CdS <sup>1</sup>                                                           | 5.17 g L <sup>-1</sup> | RhB (100 mL, 10 mg/L )                | 500 W, Xe lamp, $\lambda < 420$ nm     | 90%, 60min              | -                         | 3 <sup>rd</sup> run, 80%                       |
| RGO/ZnO <sup>3</sup>                                                              | 0.1 g L <sup>-1</sup>  | RhB (100 mL, 1.00*10 <sup>-5</sup> M) | Xe lamp                                | 97.5%, 120 min          | -                         | 4 <sup>th</sup> run, 95.5%                     |
| Ag/ZnO/g-C <sub>3</sub> N <sub>4</sub> <sup>4</sup>                               | 100µg/ mL              | <i>E. coli</i>                        | 300 W, Xe lamp, $\lambda > 400$ nm     | -                       | 10 <sup>7</sup> , 120 min | 3 <sup>rd</sup> run, 6.12 log inactivated      |
| BiOCl-Au-CdS <sup>5</sup>                                                         | 1 g L <sup>-1</sup>    | MO (50 mg/L, 20 mg/L)                 | 300 W, Xe lamp, (AM1.5)                | 98%, 180 min            | -                         | -                                              |
| Fe <sub>2</sub> O <sub>3</sub> /ZnO/ZnFe <sub>2</sub> O <sub>4</sub> <sup>6</sup> | 0.6 g L <sup>-1</sup>  | RhB/MO (50 mL, 20 mg/L )              | 500 W, halide lamp, $\lambda > 420$ nm | 95.7%/52.3%, 1h         | -                         | 3 <sup>rd</sup> run, 88.9%                     |
| This work                                                                         | 0.7 g L <sup>-1</sup>  | MO (70 mL, 10 mg/L) <i>E. coli</i>    | 500 W, Xe lamp, $\lambda > 420$ nm     | 95%, 60 min             | 10 <sup>7</sup> , 60 min  | 5 <sup>th</sup> run, 96%, 6.63 log inactivated |

## 1 Reference

- 2 1. Z. J. Yu, M. R. Kumar, Y. Chu, H. X. Hao, Q. Y. Wu and H. D. Xie, *ACS*  
3 *Sustainable Chem. Eng.*, 2018, **6**, 155-164.
- 4 2. X. Yao and W. D. Zhang, *Eur. J. Inorg. Chem.*, 2015, **2015**, 1744-1751.
- 5 3. Z. Dawei, Z. Yi, D. Yuehong, X. Ye, Z. Ya, Z. Zhen and Z. Dandan,  
6 *ChemistrySelect*, 2018, **3**, 8740-8747.
- 7 4. S. Ma, S. Zhan, Y. Xia, P. Wang, Q. Hou and Q. Zhou, *Catal. Today*, 2019,  
8 **330**, 179-188.
- 9 5. Q. Li, Z. Guan, D. Wu, X. Zhao, S. Bao, B. Tian and J. Zhang, *ACS*  
10 *Sustainable Chem. Eng.*, 2017, **5**, 6958-6968.
- 11 6. X. Li, B. Jin, J. Huang, Q. Zhang, R. Peng and S. Chu, *Solid State Sci.*, 2018,  
12 **80**, 6-14.
- 13
